# Supplementary material for: Fe2O3 for stable K-ion storage: mechanism insight into dimensional construction from stress distribution and micro-tomography
Source: Royal Society of Chemistry journal article supplement (doi:10.1039/d3cp03495j), 2023-01-01
Supplement: d3cp03495j1.pdf [file d3cp03495j1.pdf]

## Supporting Information

### **Fe<sub>2</sub>O<sub>3</sub> for stable K-ion storage: mechanism insight into dimensional construction from stress distribution and micro-tomography**

Haiting Shi\*, Qingqing Wu, Jinxi Bao, Shuaitong Liang, Yanli Hu, Ruiqi Shao, Shuo Wang, Jie Shi, Zhiwei Xu\*

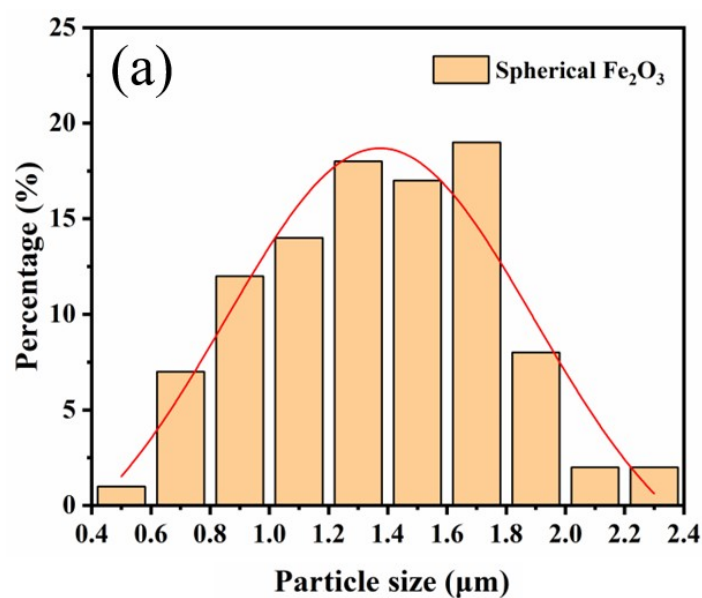

**Figure S1.** The particle size distribution of spherical Fe<sub>2</sub>O<sub>3</sub>.

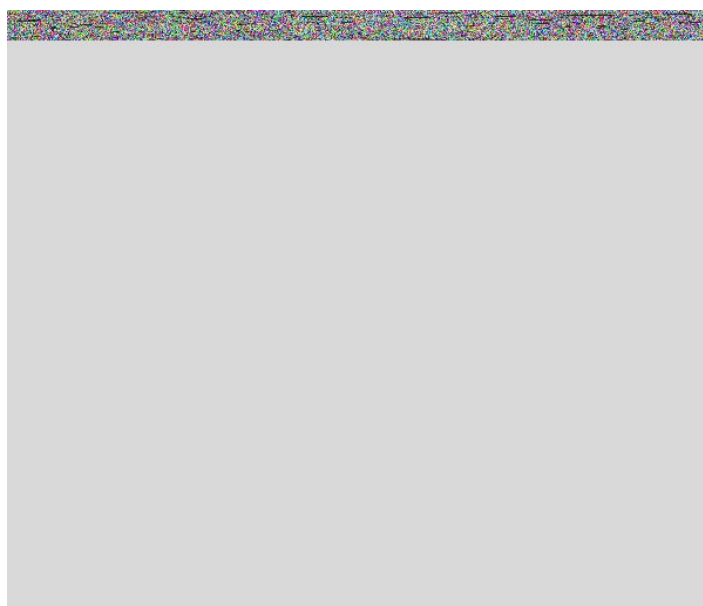

**Figure S2.** The particle size distribution of flower-like  $\text{Fe}_2\text{O}_3$ .

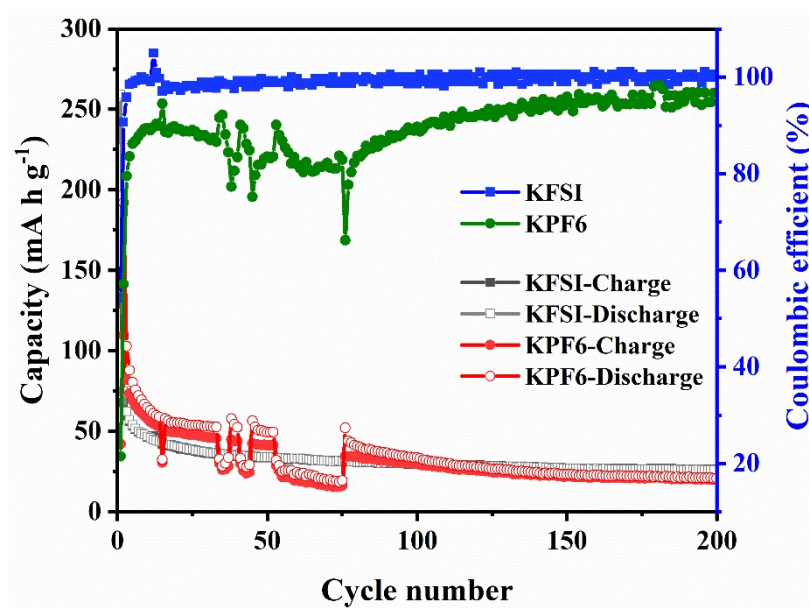

**Figure S3.** Cycling performance of  $\text{Fe}_2\text{O}_3$  electrode in two kinds of electrolytes.

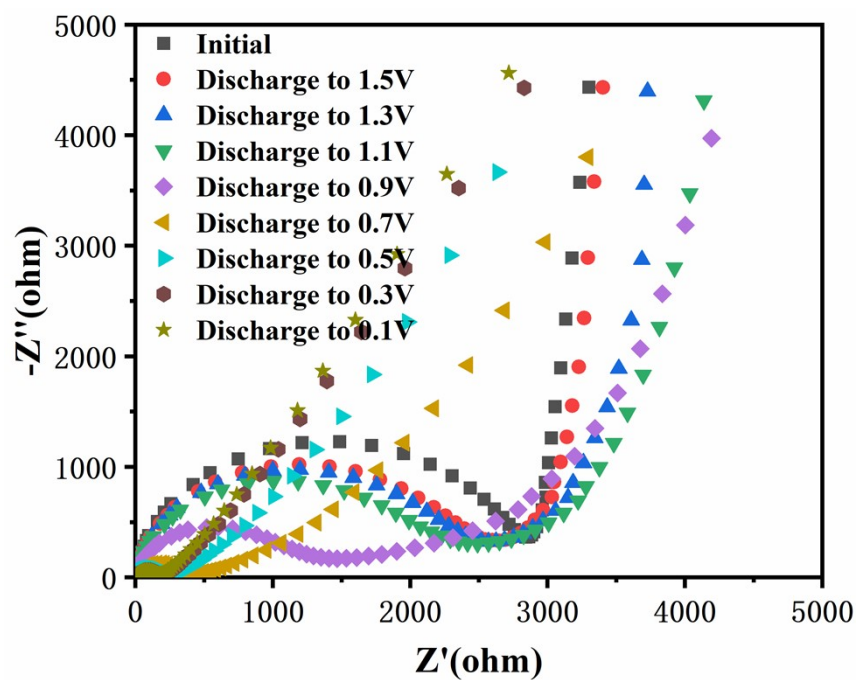

**Figure S4.** Nyquist plots of the spherical  $\text{Fe}_2\text{O}_3$  during the first cycle at various discharge voltages.

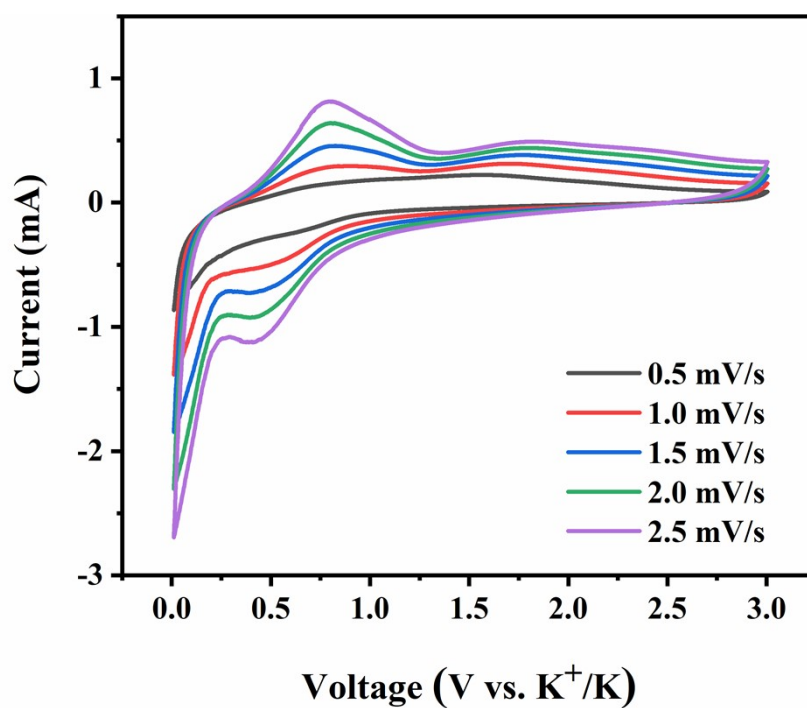

**Figure S5.** CV curves of the spherical  $\text{Fe}_2\text{O}_3$

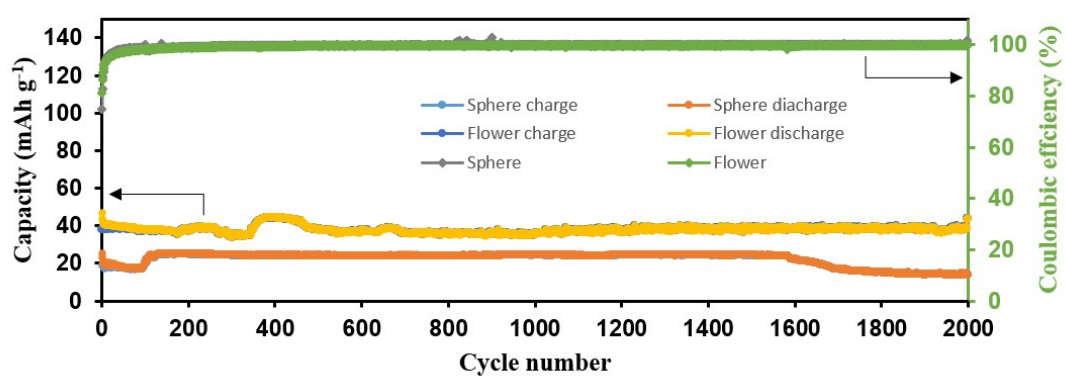

**Figure S6.** The long cycle performance of the spherical and flower-like  $\text{Fe}_2\text{O}_3$  at the current density of  $2 \text{ A g}^{-1}$  was also conducted
